# Supplementary material
Source: PubMed Central journal article supplement (PMC6278963)
Supplement: 2018_193490-Disclosures_and_Contributions.pdf [file 2018_193490-Disclosures_and_Contributions.pdf]

Haematologica  
HAEMATOL/2018/193490  
Version 5

Clonally related diffuse large B-cell lymphoma and interdigitating  
dendritic cell sarcoma sharing MYC translocation

Yotaro Ochi, Nobuhiro Hiramoto, Tetsuichi Yoshizato, Yuichiro Ono,  
June Takeda, Yusuke Shiozawa, Kenichi Yoshida, Nobuyuki Kakiuchi,  
Yuichi Shiraishi, Hiroko Tanaka, Kenichi Chiba, Yasuhiro Kazuma,  
Sumie Tabata, Noboru Yonetani, Keiichiro Uehara, Daisuke Yamashita,  
Yukihiro Imai, Koji Nagafuji, Mitsunori Yamakawa, Satoru Miyano,  
Akifumi Takaori-Kondo, Seishi Ogawa, and Takayuki Ishikawa

Disclosures: none

Contributions: YOc, NH, AT-K, SO, and TI designed the study. YOc, TY, YOn, JT, KY, YShio, NK, YShir, HT, KC, and SM performed sequencing experiment and data analyses. YOc, NH, YK, ST, NY, KN, and TI were involved in the management of the patient. KU, DY, YI, and MY contributed to the histological diagnosis. YOc generated figures and tables. YOc, NH, TY, and TI wrote the manuscript. All authors participated in discussions and interpretation of the results and approved the final manuscript.
